# Supplementary material for: Trifluoroacetic acid molecules confined into/onto metal–organic frameworks using H2btzip for efficiently improving proton conductivity using a synergistic effect
Source: Royal Society of Chemistry journal article supplement (doi:10.1039/d4qi00605d), 2024-01-01
Supplement: d4qi00605d1.pdf [file d4qi00605d1.pdf]

# Trifluoroacetic Acid Molecules Confined into/onto Metal Organic Frameworks Based on H<sub>2</sub>btzip for Improving Efficiently Proton Conductivity by the Synergistic Effect

*Xiaoxue Ma, ‡<sup>a</sup> Xin Li, ‡<sup>a</sup> Xueke Han, <sup>a</sup> Lu Zhang, <sup>a</sup> Ronghua Liu, <sup>a</sup> Hongguo Hao, <sup>a\*</sup> Hui Yan, <sup>a</sup> Xin Zhao, <sup>a</sup> Xiangjin Kong, <sup>a</sup> Huawei Zhou, <sup>a</sup> Xia Li, <sup>a</sup> Hongjie Zhu, <sup>a</sup> Suna Wang, <sup>a</sup> Yunwu Li, <sup>a</sup> Dichang Zhong, <sup>b</sup> Fangna Dai <sup>c</sup>*

<sup>a</sup>Shandong Provincial Key Laboratory of Chemical Energy Storage and Novel Cell Technology, School of Chemistry and Chemical Engineering, and School of Pharmacy, Liaocheng University, Liaocheng 252059, China.

<sup>b</sup>Institute for New Energy Materials and Low Carbon Technologies School of Materials Science and Engineering Tianjin University of Technology Tianjin 300384, China.

<sup>c</sup>College of Science, School of Materials Science and Engineering, China University of Petroleum (East China), Qingdao, Shandong 266580, China.

‡ Xiaoxue Ma <sup>a‡</sup> and Xin Li <sup>a‡</sup> contributed equally to this work.

\* Corresponding Authors, E-mail: [hkg207@126.com](mailto:hkg207@126.com).

# Supplementary Information

## Contents

|                                                                                                                        |    |
|------------------------------------------------------------------------------------------------------------------------|----|
| 1. Materials and Methods. ....                                                                                         | 1  |
| 2. The details information of <b>LCUH-107</b> , <b>LCUH-108</b> , <b>TFA/LCUH-107</b> , and <b>TFA@LCUH-108</b> . .... | 1  |
| 2.1. Synthesis of $[\text{Zn}(\text{btzip})(\text{H}_2\text{O})] \cdot \text{H}_2\text{O}$ ( <b>LCUH-107</b> ) ....    | 1  |
| 3. Crystal structure of <b>LCUH-107</b> . ....                                                                         | 2  |
| 4. AC Impedance Analysis. ....                                                                                         | 7  |
| 5. References. ....                                                                                                    | 23 |

## 1. Materials and Instrumentations.

All reagents and solvents were obtained commercially and used without any purification. Crystal data were obtained from a Rigaku Oxford Diffraction Gemini diffractometer, equipped with a Mo  $K\alpha$  and Cu  $K\alpha$  with  $\omega$ -scan technique. The powder X-ray diffraction patterns (PXRD) were recorded on a Rigaku D/Max-2500 diffractometer and the intensity data were recorded by continuous scan in a  $2\theta$  mode from 5 to 50°, with a step size of 0.1 and a scan speed of 20 min<sup>-1</sup>. A PerkinElmer Diamond SII thermal analyser was utilized for Thermo gravimetric analysis (TGA) tests from 298 to 1073 K, at a heating rate of 10 K min<sup>-1</sup> under a nitrogen atmosphere. A Nicolet 6700 spectrometer was applied to measure the IR spectra in the range 4000–400 cm<sup>-1</sup>. XPS characterization was carried out by using a Thermo Fisher Scientific ESCALAB spectrometer with Al  $K\alpha$  X-rays (1486.6 eV) as the light source.

## 2. The details information of LCUH-107, LCUH-108, TFA/LCUH-107, and TFA@LCUH-108.

**2.1. Synthesis of [Zn(btzip)(H<sub>2</sub>O)]·H<sub>2</sub>O (LCUH-107).** H<sub>2</sub>btzip (0.10 mmol, 30.01 mg) and ZnSO<sub>4</sub>·7H<sub>2</sub>O (0.10 mmol, 28.76 mg) in 10.0 mL deionized water was stirred for 30 min. The mixture was transferred to the Teflon-lined of a 50 mL high pressure stainless steel container and heated at 150 °C for 72 hours, and then cooled to 298 K at the rate of 0.5 °C·min<sup>-1</sup>. Subsequently, colorless bulk crystals were gathered, washed with ethanol, and dried in vacuum oven. Yield: 65.2% yield based on H<sub>2</sub>btzip. IR (KBr pellet: cm<sup>-1</sup>): 3545(s), 3422(s), 3121(s), 3089(w), 1629(s), 1530(s), 1381(s), 1282(m), 1211(w), 1141(w), 977(m), 909(w), 656(m), 586(w).

**2.2. Synthesis of [Ni(btzip)(H<sub>2</sub>btzip)] (LCUH-108).** H<sub>2</sub>btzip (0.10 mmol, 30.01 mg) and NiCl<sub>4</sub>·6H<sub>2</sub>O (0.20 mmol, 47.52 mg) in 8.0 mL DMF and 8.0 mL acetonitrile was stirred for 30 min. The mixture was transferred to the Teflon-lined of a 50 mL high pressure stainless steel container and heated at 150 °C for 72 hours, and then cooled to 298 K at the rate of 0.5 °C·min<sup>-1</sup>. Subsequently, blue sheet-like crystals were gathered, washed with ethanol, and dried in vacuum oven. Yield: 54.7% yield based on H<sub>2</sub>btzip. IR (KBr pellet: cm<sup>-1</sup>): 3131(w), 1663 (w), 1529 (w), 1387 (s), 1134 (s), 976 (m), 653 (m), 448(w).

**2.3. Synthesis of TFA/LCUH-107.** The activated 100 mg LCUH-107 was immersed in  $V_{\text{TFA}} : V_{\text{MT}} = 1 : 40, 1 : 30, 1 : 20, 1 : 10$  (V : V) solution of 10.0 mL for 1 h. The crystal was then dried under vacuum oven at 70 °C to obtain the trifluoroacetic acid-supported product TFA@LCUH-107.

**2.4. Synthesis of TFA@LCUH-108.** The activated 100 mg LCUH-108 was immersed in  $V_{\text{TFA}} : V_{\text{MT}} = 1 : 20, 1 : 15, 1 : 10, 1 : 5$  (V : V) solution of 10.0 mL for 1 h. The crystal was then dried under vacuum oven at 70 °C to obtain the trifluoroacetic acid-supported product TFA@LCUH-108.

### 3. Crystal structure of LCUH-107.

**Table S1.** Crystal Parameters for LCUH-107.

| Complex                        | LCUH-107                                                  |
|--------------------------------|-----------------------------------------------------------|
| CCDC no.                       | 2202297                                                   |
| Formula                        | $\text{C}_{12}\text{H}_{10}\text{N}_6\text{O}_6\text{Zn}$ |
| Mr                             | 399.63                                                    |
| Temperature/K                  | 298.15                                                    |
| Crystal system                 | monoclinic                                                |
| space group                    | <i>P21/c</i>                                              |
| a (Å)                          | 10.2034(8)                                                |
| b (Å)                          | 16.0013(13)                                               |
| c (Å)                          | 8.7996(7)                                                 |
| $\alpha, \beta, \gamma/^\circ$ | 90, 98.18 (3), 90                                         |
| $V/\text{Å}^3$                 | 1422.1(2)                                                 |
| Z                              | 4                                                         |
| D calcd ( $\text{g cm}^{-3}$ ) | 1.867                                                     |
| $\mu$ ( $\text{mm}^{-1}$ )     | 1.777                                                     |
| F(000)                         | 808.0                                                     |
| Reflections collected          | 6647                                                      |

|                        |        |
|------------------------|--------|
| <b>R<sub>int</sub></b> | 0.0494 |
| <b>Goodness of fit</b> | 1.052  |

**Table S2.** Selected Bond Lengths (Å) of LCUH-107.

| LCUH-107            |          |
|---------------------|----------|
| Atom-Atom           | Length/Å |
| N6-Zn1 <sup>1</sup> | 2.140(3) |
| O5-Zn1              | 2.015(3) |
| O1-Zn1 <sup>2</sup> | 1.966(3) |
| O4-Zn1 <sup>3</sup> | 2.074(3) |
| Zn1-N1              | 2.063(3) |

**Table S3.** Selected bond angles (°) for LCUH-107.

| LCUH-107                             |            |
|--------------------------------------|------------|
| Atom-Atom-Atom                       | Angle/°    |
| O5-Zn1-N6 <sup>4</sup>               | 85.08(12)  |
| O5-Zn1-O4 <sup>5</sup>               | 88.82(11)  |
| O5-Zn1-N1                            | 116.98(13) |
| O1 <sup>6</sup> -Zn1-N6 <sup>4</sup> | 97.00(12)  |
| O1 <sup>6</sup> -Zn1-O5              | 141.51(13) |
| O1 <sup>6</sup> -Zn1-O4 <sup>5</sup> | 88.05(11)  |
| O1 <sup>6</sup> -Zn1-N1 <sup>2</sup> | 87.64(6)   |
| O4 <sup>5</sup> -Zn1-N6 <sup>4</sup> | 173.41(6)  |
| N1-Zn1-N6 <sup>4</sup>               | 95.15(12)  |
| N1-Zn1-O4 <sup>5</sup>               | 87.21(12)  |
| C9-N1-Zn1                            | 136.6(2)   |
| C10-N1-Zn1                           | 120.2(3)   |
| C8-O4-Zn1 <sup>3</sup>               | 132.2(3)   |
| C7-O1-Zn1 <sup>2</sup>               | 125.8(3)   |
| C1 <sup>1</sup> -N6-Zn1 <sup>1</sup> | 126.2(3)   |

|                                          |          |
|------------------------------------------|----------|
| <b>C1<sup>2</sup>-N6-Zn1<sup>1</sup></b> | 129.6(3) |
|------------------------------------------|----------|

**Table S4.** Crystal Parameters for LCUH-108.

| <b>Complex</b>                     | <b>LCUH-108</b>                                                   |
|------------------------------------|-------------------------------------------------------------------|
| <b>CCDC no.</b>                    | 2297919                                                           |
| <b>Formula</b>                     | C <sub>24</sub> H <sub>14</sub> N <sub>12</sub> O <sub>8</sub> Ni |
| <b>Mr</b>                          | 657.18                                                            |
| <b>Temperature/K</b>               | 298.15                                                            |
| <b>Crystal system</b>              | Orthorhombic                                                      |
| <b>space group</b>                 | <i>Pbcm</i>                                                       |
| <b>a (Å)</b>                       | 7.2370(8)                                                         |
| <b>b (Å)</b>                       | 20.4549(19)                                                       |
| <b>c (Å)</b>                       | 24.962(2)                                                         |
| <b>α, β, γ/°</b>                   | 90, 90, 90                                                        |
| <b>V/Å<sup>3</sup></b>             | 3695.2(6)                                                         |
| <b>Z</b>                           | 13                                                                |
| <b>D calcd (g cm<sup>-3</sup>)</b> | 1.181                                                             |
| <b>μ (mm<sup>-1</sup>)</b>         | 0.579                                                             |
| <b>F(000)</b>                      | 1336                                                              |
| <b>Reflections collected</b>       | 3348                                                              |
| <b>Goodness of fit</b>             | 1.012                                                             |

**Table S5.** Selected Bond Lengths (Å) of LCUH-108.

| <b>LCUH-108</b>  |                 |
|------------------|-----------------|
| <b>Atom-Atom</b> | <b>Length/Å</b> |
| <b>N6-Ni1</b>    | 2.088(7)        |
| <b>O2-Ni1</b>    | 2.093(5)        |
| <b>N3-Ni1</b>    | 2.103(7)        |

**Table S6.** Selected bond angles (°) for LCUH-108.

---

**LCUH-108**

---

| Atom-Atom-Atom                                    | Angle/ $^{\circ}$ |
|---------------------------------------------------|-------------------|
| N6 <sup>1</sup> -Ni <sup>1</sup> -N6              | 180.0(4)          |
| N6 <sup>1</sup> -Ni <sup>1</sup> -O2 <sup>2</sup> | 85.6(2)           |
| N6-Ni1-O2 <sup>2</sup>                            | 94.4(2)           |
| N6 <sup>1</sup> -Ni1-O2 <sup>3</sup>              | 94.4(2)           |
| N6-Ni1-O2 <sup>3</sup>                            | 85.6(2)           |
| O2 <sup>2</sup> -Ni1-O2 <sup>3</sup>              | 180.0             |
| N6 <sup>1</sup> -Ni1-N3                           | 93.2(3)           |
| N6-Ni1-N3                                         | 86.8(3)           |
| O2 <sup>2</sup> -Ni1-N3                           | 88.7(2)           |
| O2 <sup>3</sup> -Ni1-N3                           | 91.3(2)           |
| N6 <sup>1</sup> -Ni1-N3 <sup>1</sup>              | 86.8(3)           |
| N6-Ni1-N3 <sup>1</sup>                            | 93.2(3)           |
| O2 <sup>2</sup> -Ni1-N3 <sup>1</sup>              | 91.3(2)           |
| O2 <sup>3</sup> -Ni1-N3 <sup>1</sup>              | 88.7(2)           |
| N3-Ni1-N3 <sup>1</sup>                            | 180.0             |
| C16-N3-Ni1                                        | 129.2(6)          |
| C17-N3-Ni1                                        | 127.7(6)          |
| C8-O2-Ni3 <sup>6</sup>                            | 132.1(5)          |
| C1-N6-Ni1                                         | 124.1(6)          |
| C21-N6-Ni1                                        | 130.1(6)          |

---

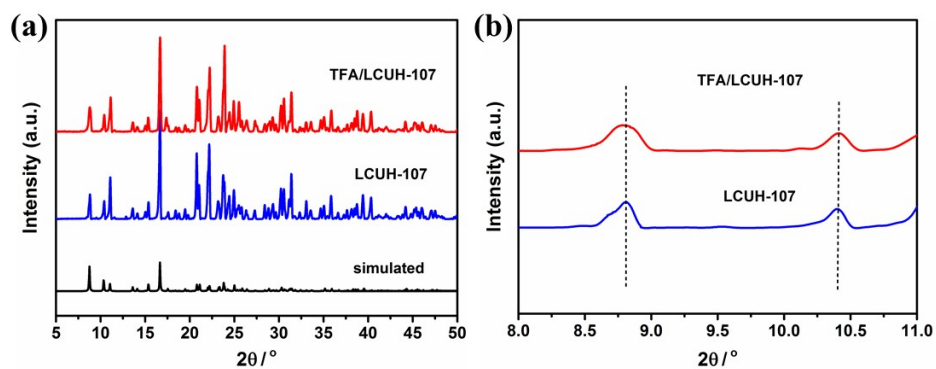

**Figure S1.** (a) and (b) The simulated PXRD pattern of LCUH-107 (black line) and PXRD patterns of synthesized LCUH-107 sample (red line) and TFA/LCUH-107 sample (blue line).

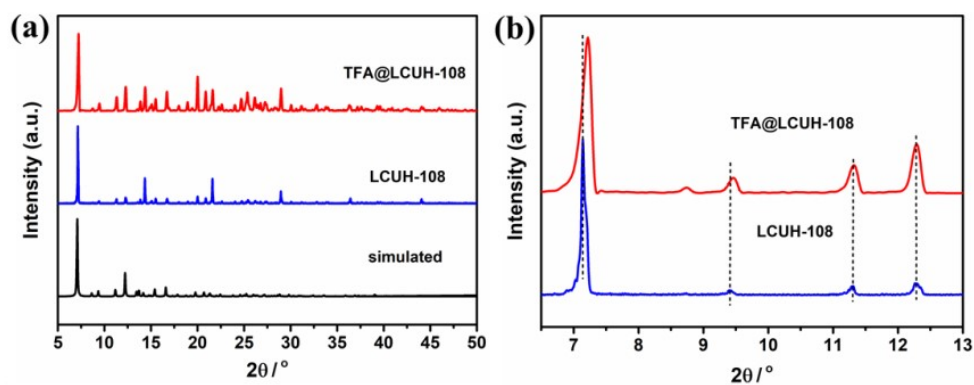

**Figure S2.** (a) and (b) The simulated PXRD pattern of LCUH-108 (black line) and PXRD patterns of synthesized LCUH-108 sample (red line) and TFA@LCUH-108 sample (blue line).

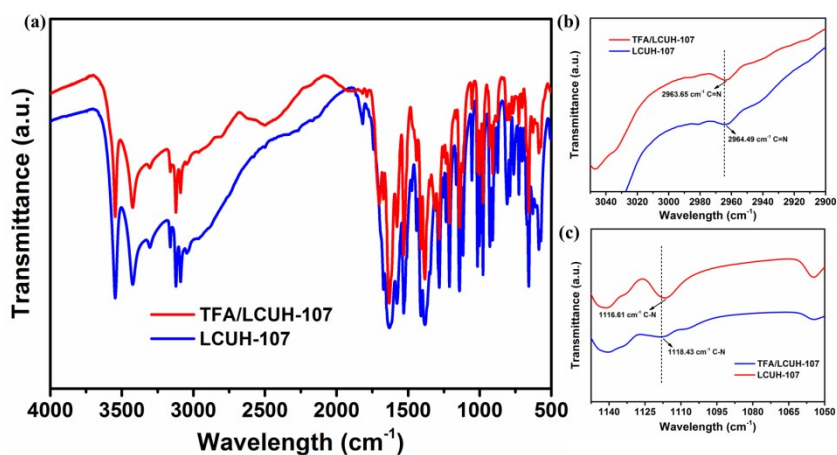

**Figure S3.** (a), (b), and (c) IR spectra (KBr pellet,  $\text{cm}^{-1}$ ) of LCUH-107 (blue line) and TFA/LCUH-107 (red line).



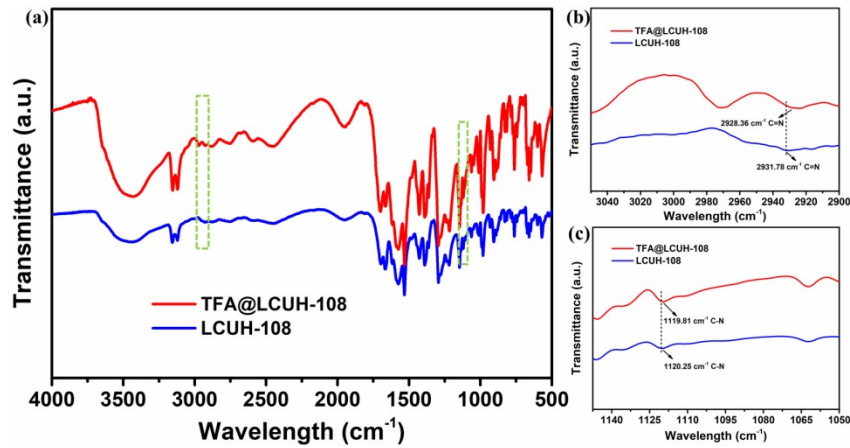

**Figure S4.** (a), (b), and (c) IR spectra (KBr pellet,  $\text{cm}^{-1}$ ) of **LCUH-108** (blue line) and **TFA@LCUH-108** (red line).

#### 4. AC Impedance Analysis.

The 80–100 mg sample was put into the customized mold of  $10 \text{ mm} \times 4 \text{ mm}$  and pressed under 2 MPa pressure for 3 min to make the cuboid sample block. The size of the cuboid sample block was accurately measured by the vernier caliper. Apply silver glue to both sides of the cuboid sample block and connect them to the latex sample table with silver wire. The sample stand is then placed in a custom-made double glass bottle and sealed at a certain temperature controlled by a high-temperature circulation tank. The AC impedance spectra were tested on CHI-760E electrochemical workstation with a frequency range of 1 Hz to 1 MHz and signal amplitude of 200 mV. Impedance spectra at different temperatures and relative humidities were recorded where the relative humidities were controlled by standard saturated aqueous solutions of different salts.

The proton conductivity values were calculated by the following equation:

$$\sigma = \frac{l}{RS} \quad (1)$$

where  $\sigma$  is the proton conductivity ( $\text{S} \cdot \text{cm}^{-1}$ ),  $l$  is the length (cm) of the cube,  $S$  is the area covered with silver glue ( $\text{cm}^2$ ) and  $R$  is the bulk resistance ( $\Omega$ ).

The activation energy ( $E_a$ ) was calculated by the following equation:

$$\ln \sigma_T = \ln \sigma_0 - \frac{E_a}{KT} \quad (2)$$

where  $\sigma$  is the proton conductivity ( $\text{S}\cdot\text{cm}^{-1}$ ),  $\sigma_0$  is the preexponential factor,  $K$  is the Boltzmann constant ( $\text{eV}/\text{K}$ ), and  $T$  is the temperature ( $\text{K}$ ).

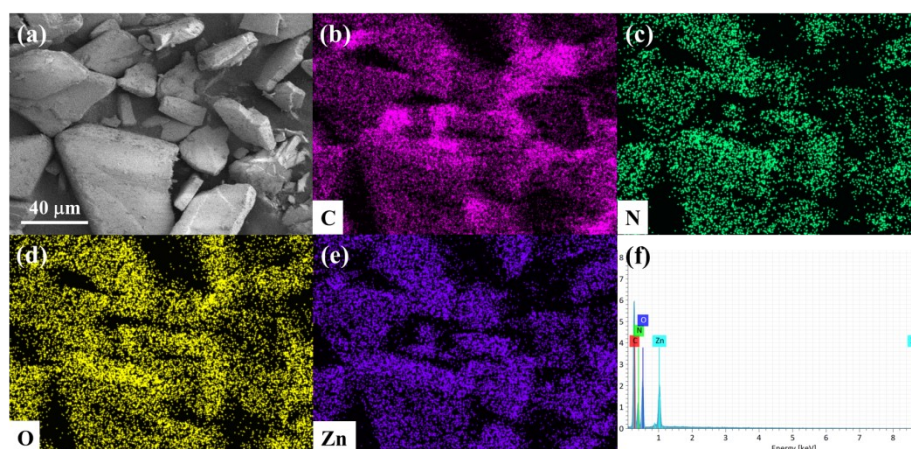

**Figure S5.** SEM image of LCUH-107 (a); energy-dispersive elemental mapping images for LCUH-107: C (b), N (c), O (d), and Zn (e); EDS image of LCUH-107 (f).

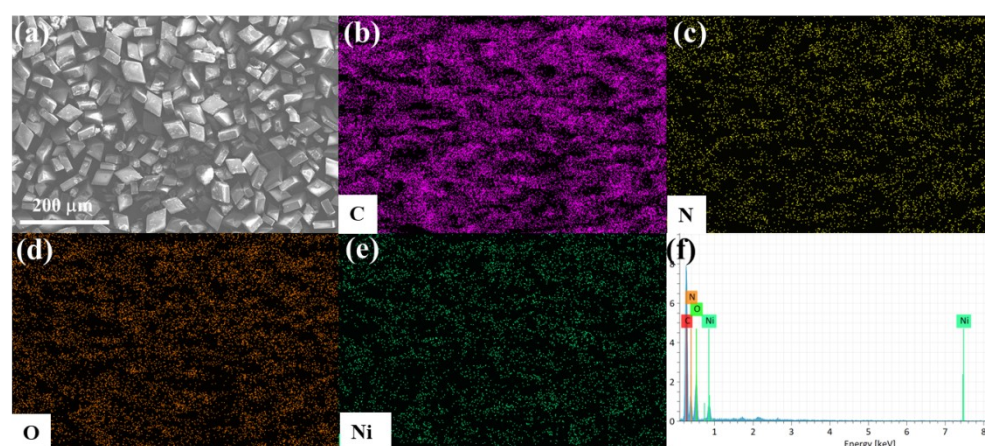

**Figure S6.** SEM image of LCUH-108 (a); energy-dispersive elemental mapping images for LCUH-108: C (b), N (c), O (d), and Ni (e); EDS image of LCUH-108 (f).

**Table S7.** The conductivity values ( $\text{S}\cdot\text{cm}^{-1}$ ) of TFA/LCUH-107 by different volume ratios of trifluoroacetic acid (TFA) and methanol (MT) under 100% RH and 80 °C.

| $V_{\text{TFA}} : V_{\text{MT}}$             | 1 : 10 | 1 : 20 | 1 : 30 | 1 : 40 |
|----------------------------------------------|--------|--------|--------|--------|
| $\sigma(10^{-2}\text{S}\cdot\text{cm}^{-1})$ | 3.00   | 2.95   | 1.33   | 1.16   |

The effect of different volume ratios of trifluoroacetic acid (TFA) to methanol (MT) on the proton conductivity of TFA/LCUH-107 was determined. For TFA/LCUH-107, when the volume ratios of TFA and MT ( $V_{\text{TFA}} : V_{\text{MT}}$ ) are 1 : 40, 1 : 30, 1 : 20, and 1 : 10, the conductivities of TFA/LCUH-107 are  $1.16 \times 10^{-2}$ ,  $1.33 \times 10^{-2}$ ,  $2.95 \times 10^{-2}$ , and  $3.00 \times 10^{-2}$

$\text{S}\cdot\text{cm}^{-1}$ , respectively. When  $V_{\text{TFA}} : V_{\text{MT}}$  from 1 : 20 to 1 : 10, the conductivity of TFA/LCUH-107 increases only a little ( $5.0 \times 10^{-4} \text{ S}\cdot\text{cm}^{-1}$ ). Therefore, from the aspects of cost and conductivity, we selected the values of  $V_{\text{TFA}} : V_{\text{MT}}$  of 1 : 20 to synthesize TFA/LCUH-107 for experimental investigation.

**Table S8.** The conductivity values ( $\text{S}\cdot\text{cm}^{-1}$ ) of TFA@LCUH-108 by different volume ratios of trifluoroacetic acid (TFA) and methanol (MT) under 100% RH and 80 °C.

| $V_{\text{TFA}} : V_{\text{MT}}$               | 1 : 5 | 1 : 10 | 1 : 15 | 1 : 20 |
|------------------------------------------------|-------|--------|--------|--------|
| $\sigma(10^{-1} \text{ S}\cdot\text{cm}^{-1})$ | 2.02  | 2.05   | 0.88   | 0.59   |

Similarly, the effect of different volume ratios of trifluoroacetic acid (TFA) to methanol (MT) on the proton conductivity of TFA@LCUH-108 was determined. For TFA@LCUH-108, when the volume ratios of TFA and MT ( $V_{\text{TFA}} : V_{\text{MT}}$ ) are 1 : 20, 1 : 15, 1 : 10, and 1 : 5, the conductivities of TFA@LCUH-108 are  $5.90 \times 10^{-2}$ ,  $8.80 \times 10^{-2}$ ,  $2.05 \times 10^{-1}$ , and  $2.02 \times 10^{-1} \text{ S}\cdot\text{cm}^{-1}$ , respectively. When  $V_{\text{TFA}} : V_{\text{MT}}$  from 1 : 10 to 1 : 5, the conductivity change of TFA@LCUH-108 is negligible. Therefore, from the aspects of cost and conductivity, we selected the values of  $V_{\text{TFA}} : V_{\text{MT}}$  of 1 : 10 to synthesize TFA@LCUH-108 for experimental investigation.

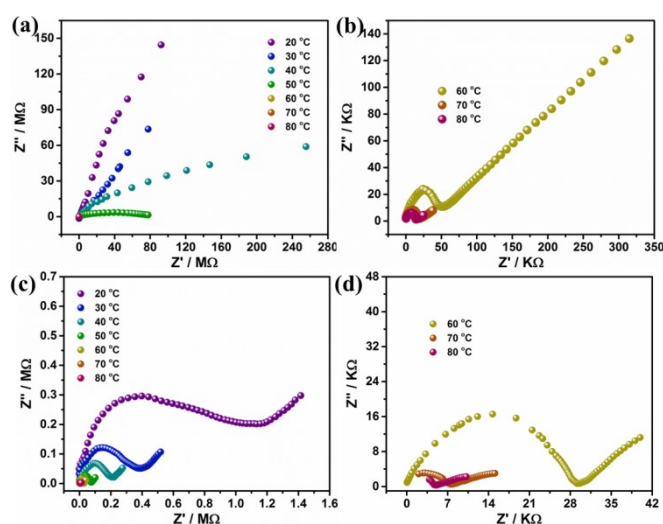

**Figure S7.** Impedance spectra of LCUH-107 (a) and (b), and TFA/LCUH-107 (c) and (d) at 45% RH.

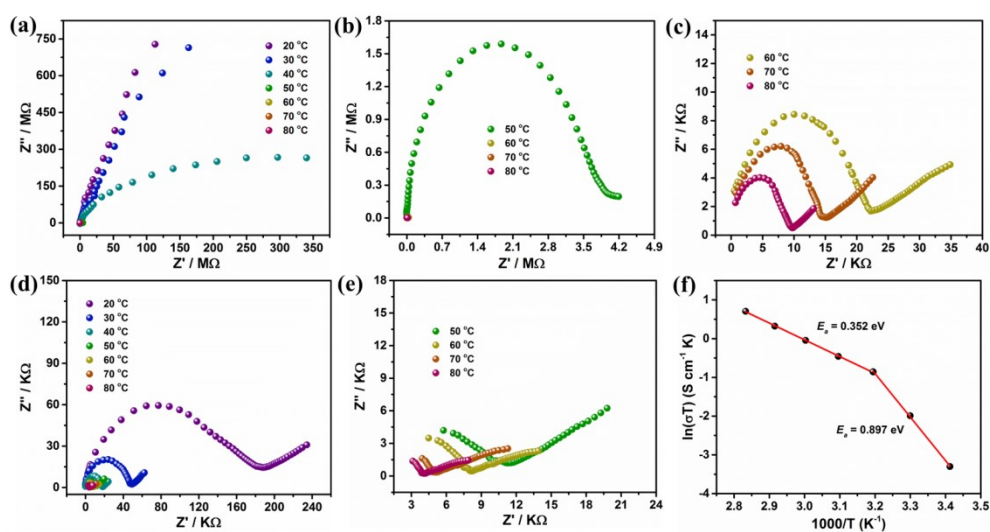

**Figure S8.** Impedance spectra of LCUH-107 (a), (b), and (c) and TFA/LCUH-107 (d) and (e) at 60% RH (c); Arrhenius plots of proton conductivities for TFA/LCUH-107 (f) at 60% RH.

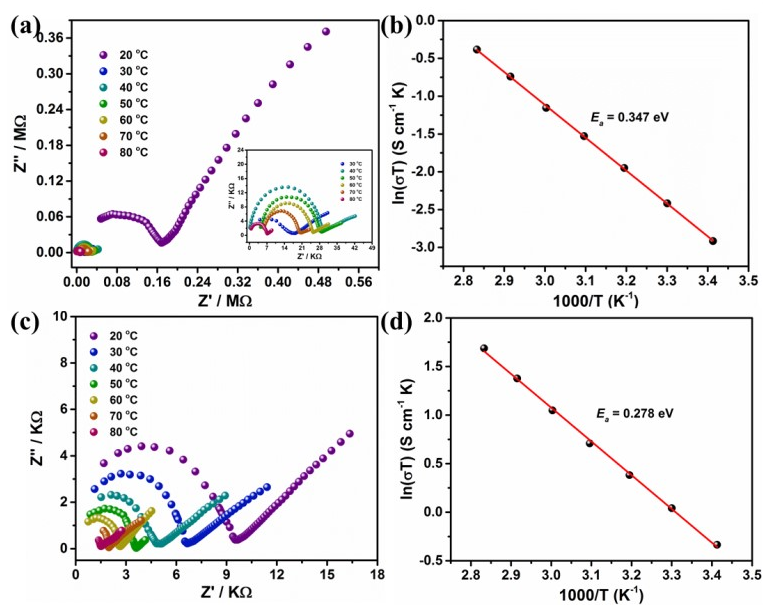

**Figure S9.** Impedance spectra of LCUH-107 (a) and TFA/LCUH-107 (c) at 75% RH; Arrhenius plots of proton conductivities for LCUH-107 (b) and TFA/LCUH-107 (d) at 75% RH.

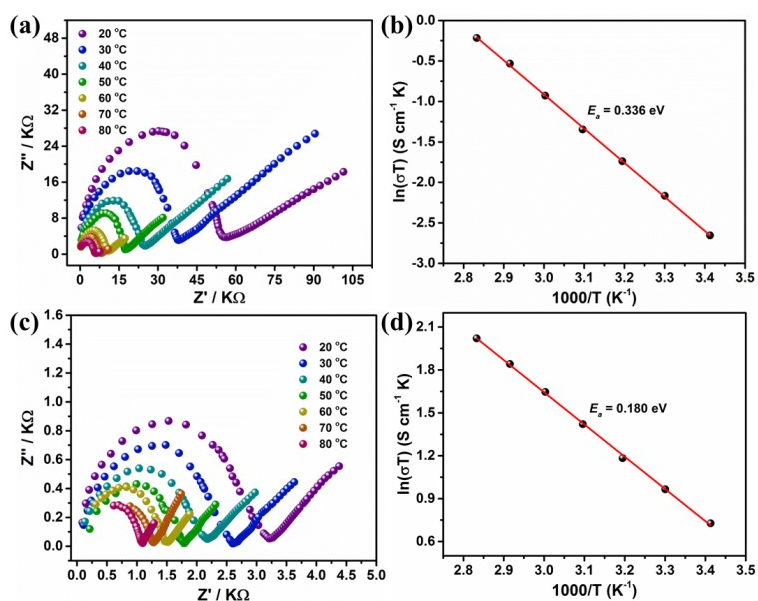

**Figure S10.** Impedance spectra of LCUH-107 (a) and TFA/LCUH-107 (c) at 85% RH; Arrhenius plots of proton conductivities for LCUH-107 (b) and TFA/LCUH-107 (d) at 85% RH.

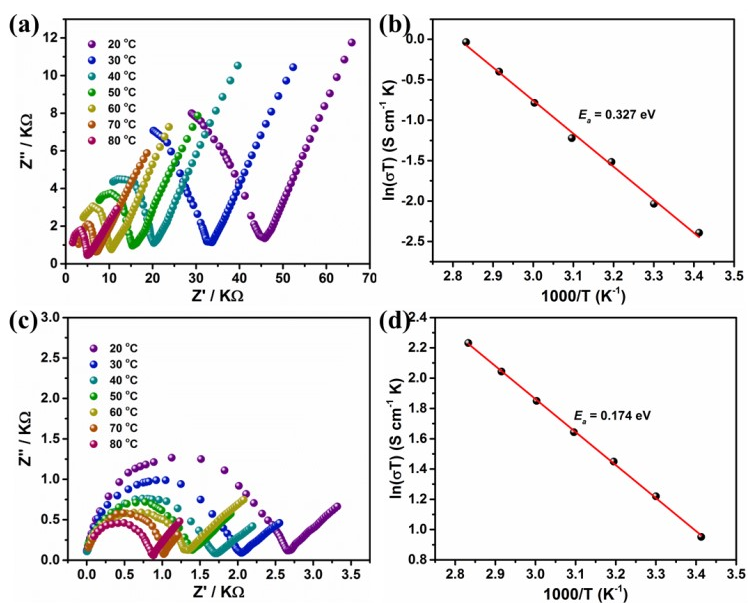

**Figure S11.** Impedance spectra of LCUH-107 (a) and TFA/LCUH-107 (c) at 93% RH; Arrhenius plots of proton conductivities for LCUH-107 (b) and TFA/LCUH-107 (d) at 93% RH.

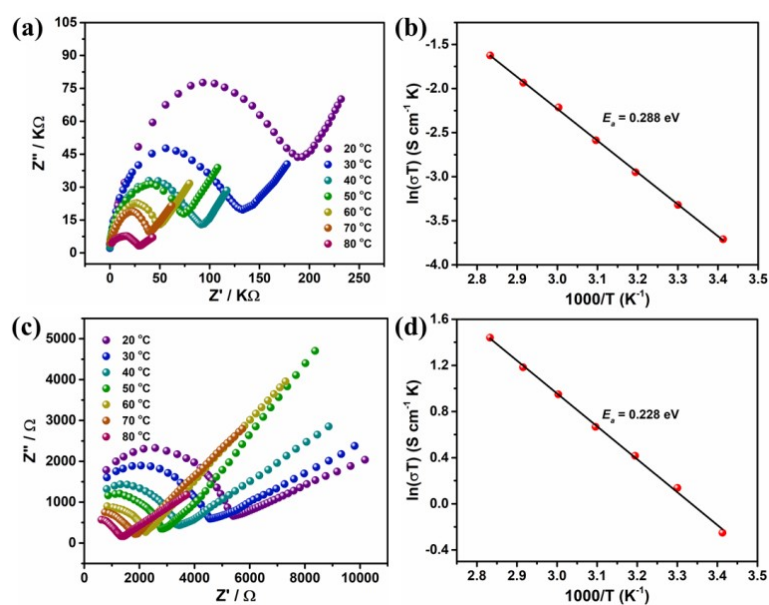

**Figure S12.** Impedance spectra of **LCUH-108** (a) and **TFA@LCUH-108** (c) at 45% RH; Arrhenius plots of proton conductivities for **LCUH-108** (b) and **TFA@LCUH-108** (d) at 45% RH.

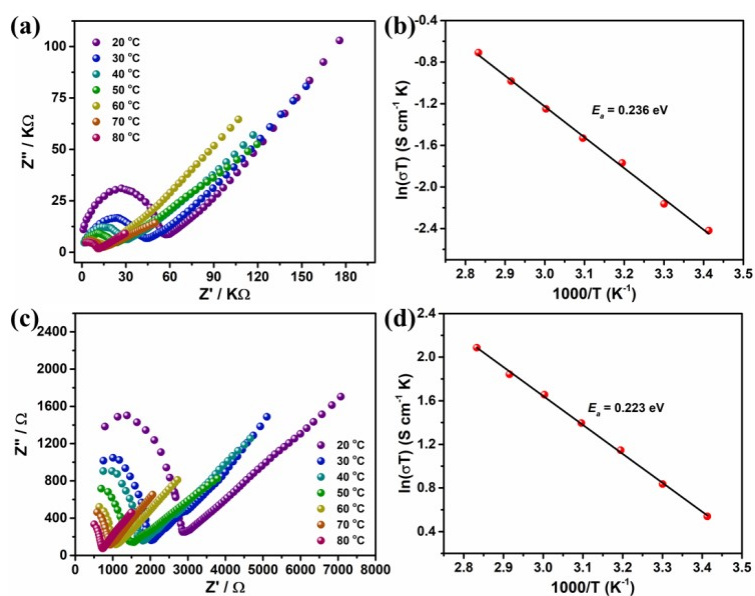

**Figure S13.** Impedance spectra of **LCUH-108** (a) and **TFA@LCUH-108** (c) at 60% RH; Arrhenius plots of proton conductivities for **LCUH-108** (b) and **TFA@LCUH-108** (d) at 60% RH.

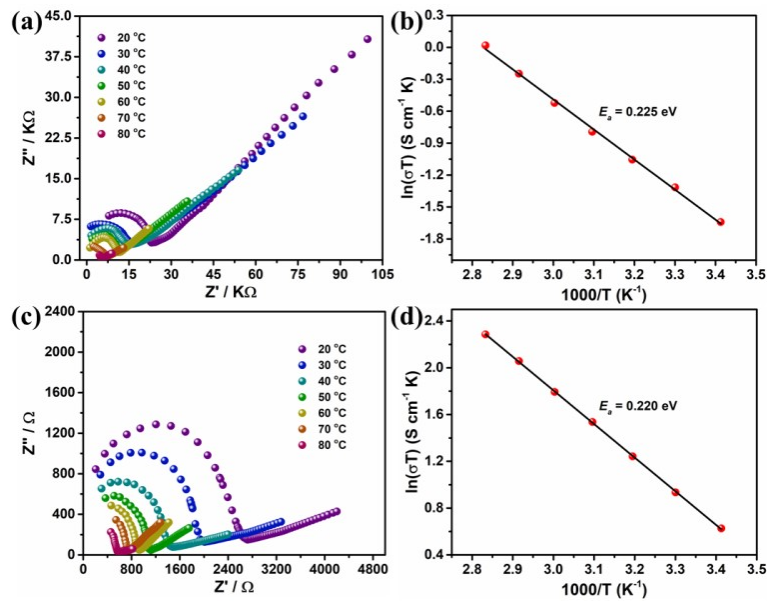

**Figure S14.** Impedance spectra of **LCUH-108** (a) and **TFA@LCUH-108** (c) at 75% RH; Arrhenius plots of proton conductivities for **LCUH-108** (b) and **TFA@LCUH-108** (d) at 75% RH.

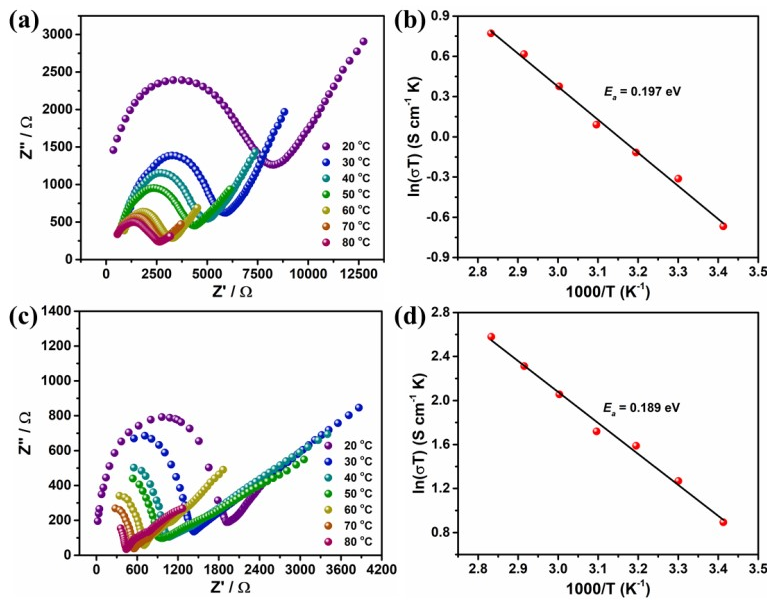

**Figure S15.** Impedance spectra of **LCUH-108** (a) and **TFA@LCUH-108** (c) at 85% RH; Arrhenius plots of proton conductivities for **LCUH-108** (b) and **TFA@LCUH-108** (d) at 85% RH.

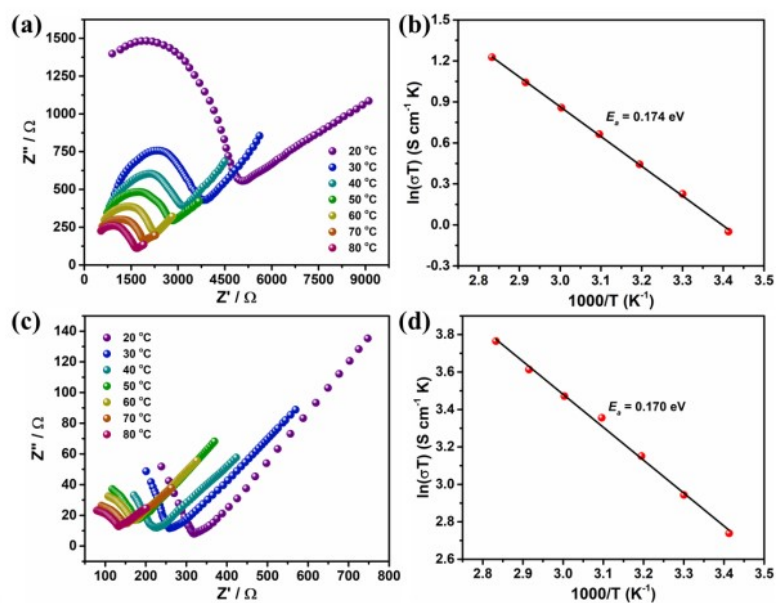

**Figure S16.** Impedance spectra of **LCUH-108** (a) and **TFA@LCUH-108** (c) at 93% RH; Arrhenius plots of proton conductivities for **LCUH-108** (b) and **TFA@LCUH-108** (d) at 93% RH.

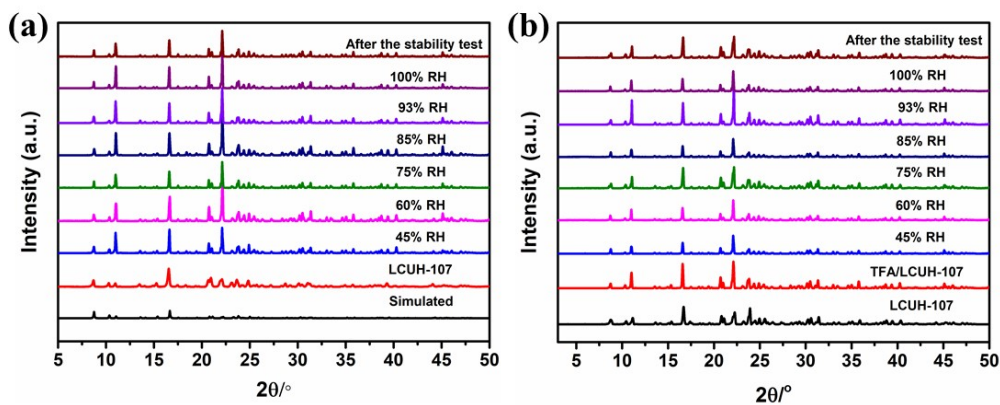

**Figure S17.** PXRD patterns of **LCUH-107** (a) and **TFA/LCUH-107** (b): as-synthesized, after impedance measurements and after stability tests.



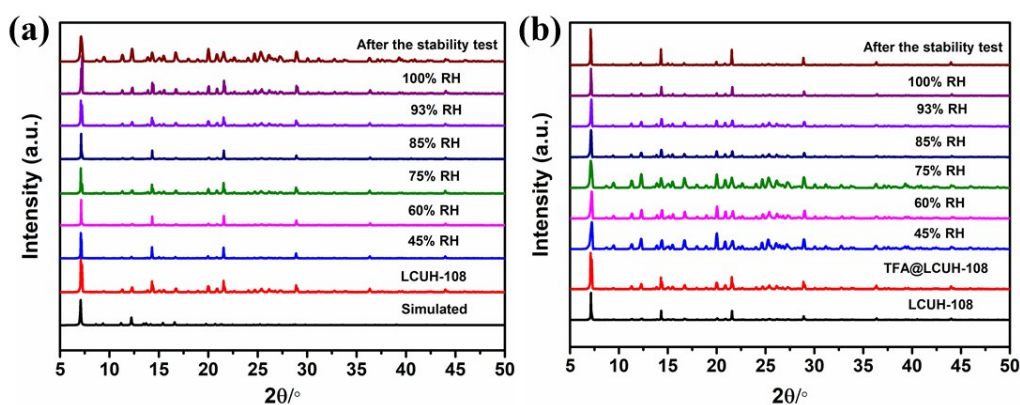

**Figure S18.** PXRD patterns of LCUH-108 (a) and TFA@LCUH-108 (b): as-synthesized, after impedance measurements and after stability tests.

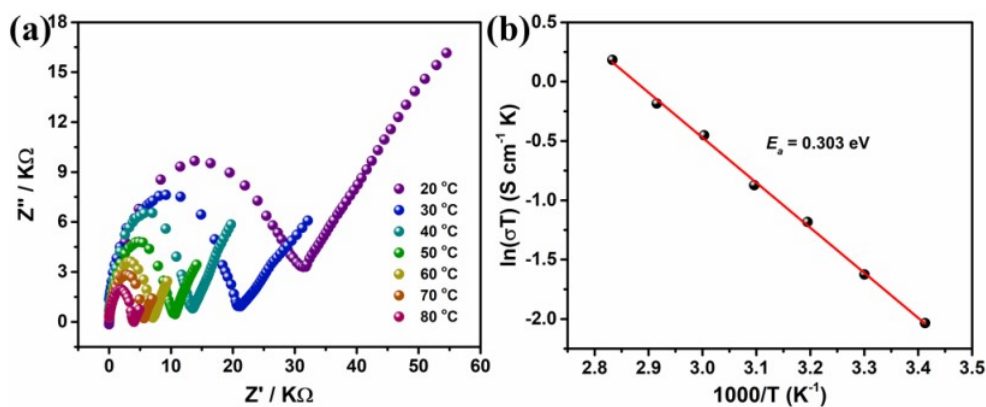

**Figure S19.** (a) Impedance spectra of TFA/LCUH-107W at 100% RH; (b) Arrhenius plots of proton conductivities for TFA/LCUH-107W at 100% RH.

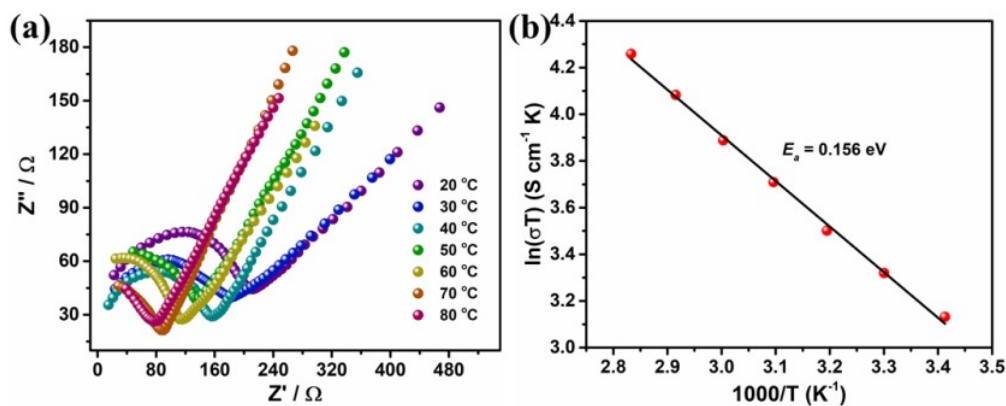

**Figure S20.** (a) Impedance spectra of TFA@LCUH-108W at 100% RH; (b) Arrhenius plots of proton conductivities for TFA@LCUH-108W at 100% RH.

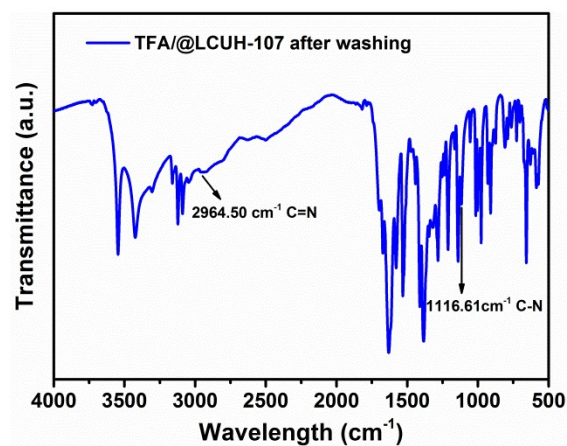

Figure S21. IR spectra (KBr pellet,  $\text{cm}^{-1}$ ) of TFA/LCUH-107W.

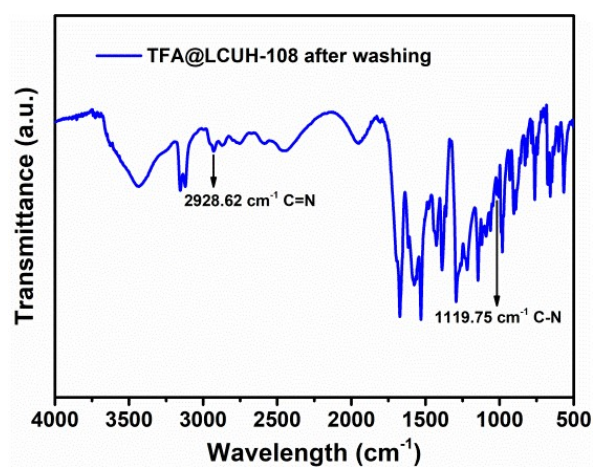

Figure S22. IR spectra (KBr pellet,  $\text{cm}^{-1}$ ) of TFA@LCUH-108W.

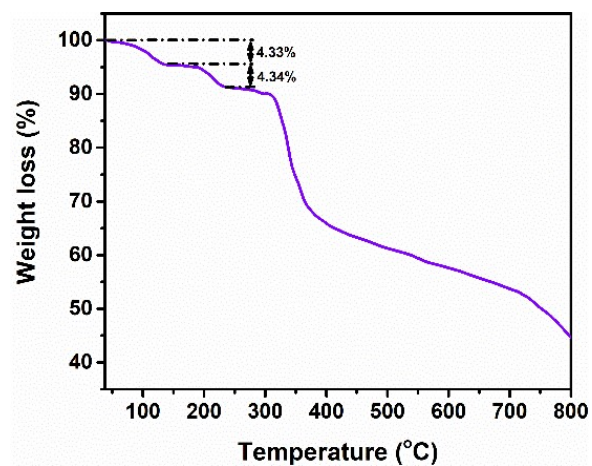

Figure S23. The TG curve of TFA/LCUH-107W.

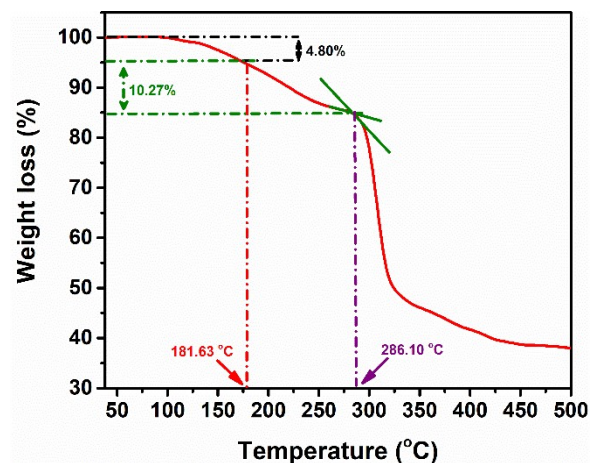

**Figure S24.** The TG curve of TFA@LCUH-108W.

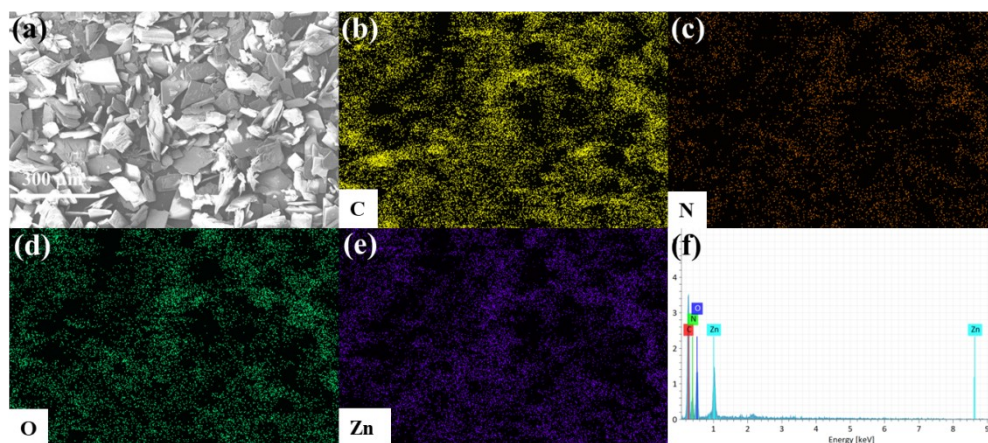

**Figure S25.** SEM image of TFA/LCUH-107W (a); energy-dispersive elemental mapping images for TFA/LCUH-107W: C (b), N (c), O (d), and Zn (e); (f) EDS image of TFA/LCUH-107W.

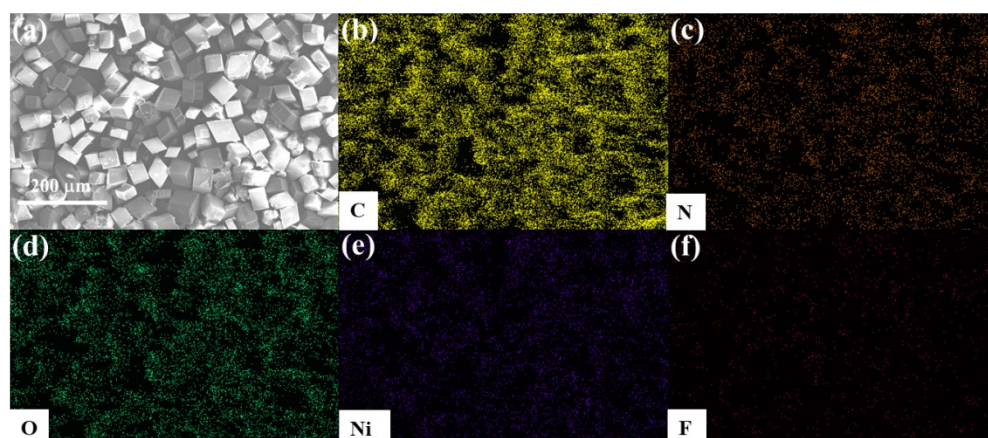

**Figure S26.** SEM image of TFA@LCUH-108W (a); energy-dispersive elemental mapping images for TFA@LCUH-108W: C (b), N (c), O (d), Ni (e), and F (f).

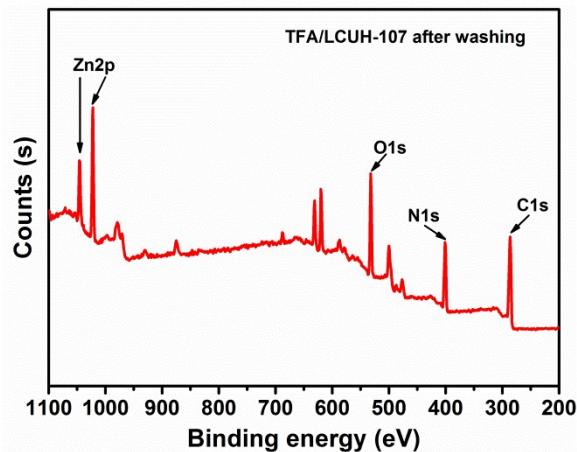

Figure S27. XPS spectra of TFA/LCUH-107W.

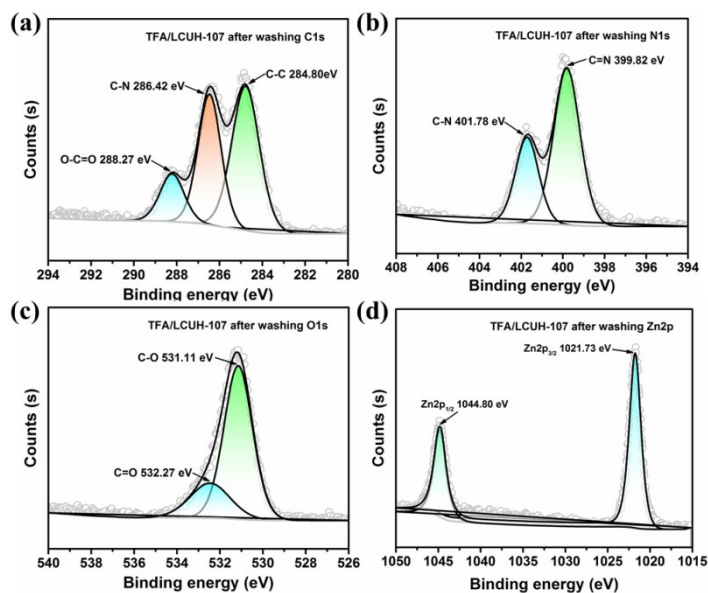

Figure S28. XPS spectra of (a) C1s, (b) N1s, (c) O1s, and (d) Zn2p in TFA/LCUH-107W.

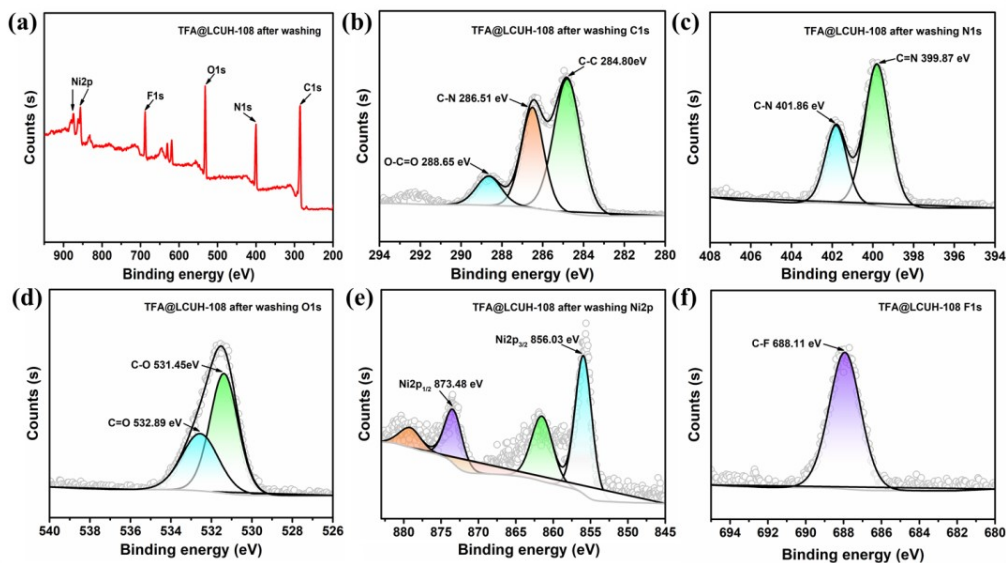

**Figure S29.** (a) XPS spectra of TFA@LCUH-108W. XPS spectra of (b) C1s, (c) N1s, (d) O1s, (e) Zn2p, and (f) F1s in TFA@LCUH-108W.

**Table S9.** Proton conductivities ( $\text{S}\cdot\text{cm}^{-1}$ ) of LCUH-107 at temperatures and different RHs

| Temp<br>(°C) | $\sigma(10^{-4}\text{S}\cdot\text{cm}^{-1})$<br>75% RH | $\sigma(10^{-4}\text{S}\cdot\text{cm}^{-1})$<br>85% RH | $\sigma(10^{-4}\text{S}\cdot\text{cm}^{-1})$<br>93% RH | $\sigma(10^{-4}\text{S}\cdot\text{cm}^{-1})$<br>100% RH |
|--------------|--------------------------------------------------------|--------------------------------------------------------|--------------------------------------------------------|---------------------------------------------------------|
| 20           | 1.85                                                   | 2.40                                                   | 3.12                                                   | 4.56                                                    |
| 30           | 2.94                                                   | 3.78                                                   | 4.31                                                   | 6.90                                                    |
| 40           | 4.55                                                   | 5.61                                                   | 7.02                                                   | 9.70                                                    |
| 50           | 6.72                                                   | 8.05                                                   | 9.12                                                   | 14.88                                                   |
| 60           | 9.46                                                   | 11.87                                                  | 13.69                                                  | 19.02                                                   |
| 70           | 13.89                                                  | 17.11                                                  | 19.55                                                  | 24.44                                                   |
| 80           | 19.31                                                  | 22.81                                                  | 27.37                                                  | 34.21                                                   |

**Table S10.** Proton conductivities ( $\text{S}\cdot\text{cm}^{-1}$ ) of TFA/LCUH-107 at temperatures and different RHs

| Temp<br>(°C) | $\sigma(10^{-3}\text{S}\cdot\text{cm}^{-1})$<br>75% RH | $\sigma(10^{-3}\text{S}\cdot\text{cm}^{-1})$<br>85% RH | $\sigma(10^{-3}\text{S}\cdot\text{cm}^{-1})$<br>93% RH | $\sigma(10^{-3}\text{S}\cdot\text{cm}^{-1})$<br>100% RH |
|--------------|--------------------------------------------------------|--------------------------------------------------------|--------------------------------------------------------|---------------------------------------------------------|
| 20           | 2.44                                                   | 7.06                                                   | 8.84                                                   | 10.19                                                   |
| 30           | 3.44                                                   | 8.66                                                   | 11.17                                                  | 12.63                                                   |
| 40           | 4.68                                                   | 10.43                                                  | 13.61                                                  | 14.64                                                   |
| 50           | 6.28                                                   | 12.81                                                  | 16.01                                                  | 18.04                                                   |
| 60           | 8.57                                                   | 15.57                                                  | 19.09                                                  | 21.49                                                   |
| 70           | 11.54                                                  | 18.39                                                  | 22.50                                                  | 24.99                                                   |
| 80           | 15.30                                                  | 21.37                                                  | 26.39                                                  | 29.49                                                   |

**Table S11.** Proton conductivities ( $\text{S}\cdot\text{cm}^{-1}$ ) of LCUH-108 at temperatures and different RHs

| Tem<br>p<br>(°C) | $\sigma(10^{-3}\text{S}\cdot\text{cm}^{-1})$<br>45% RH | $\sigma(10^{-3}\text{S}\cdot\text{cm}^{-1})$<br>60% RH | $\sigma(10^{-3}\text{S}\cdot\text{cm}^{-1})$<br>75% RH | $\sigma(10^{-3}\text{S}\cdot\text{cm}^{-1})$<br>85% RH | $\sigma(10^{-3}\text{S}\cdot\text{cm}^{-1})$<br>93% RH | $\sigma(10^{-3}\text{S}\cdot\text{cm}^{-1})$<br>100% RH |
|------------------|--------------------------------------------------------|--------------------------------------------------------|--------------------------------------------------------|--------------------------------------------------------|--------------------------------------------------------|---------------------------------------------------------|
| 20               | 0.0835                                                 | 0.304                                                  | 0.661                                                  | 1.75                                                   | 3.248                                                  | 3.926                                                   |

|    |       |       |       |       |       |        |
|----|-------|-------|-------|-------|-------|--------|
| 30 | 0.119 | 0.379 | 0.885 | 2.413 | 4.137 | 4.86   |
| 40 | 0.167 | 0.545 | 1.113 | 2.844 | 4.978 | 5.579  |
| 50 | 0.233 | 0.67  | 1.401 | 3.389 | 6.011 | 6.76   |
| 60 | 0.328 | 0.86  | 1.781 | 4.37  | 7.079 | 8.184  |
| 70 | 0.421 | 1.092 | 2.275 | 5.399 | 8.274 | 9.423  |
| 80 | 0.558 | 1.394 | 2.883 | 6.126 | 9.653 | 11.961 |

**Table S12.** Proton conductivities ( $\text{S}\cdot\text{cm}^{-1}$ ) of TFA@LCUH-108 at temperatures and different RHs

| Tem<br>p<br>(°C) | $\sigma(10^{-2}\text{S}\cdot\text{cm}^{-1})$<br>45% RH | $\sigma(10^{-2}\text{S}\cdot\text{cm}^{-1})$<br>60% RH | $\sigma(10^{-2}$<br>$\text{S}\cdot\text{cm}^{-1})$<br>75% RH | $\sigma(10^{-2}$<br>$\text{S}\cdot\text{cm}^{-1})$<br>85% RH | $\sigma(10^{-2}$<br>$\text{S}\cdot\text{cm}^{-1})$<br>93% RH | $\sigma(10^{-2}\text{S}\cdot\text{cm}^{-1})$<br>100% RH |
|------------------|--------------------------------------------------------|--------------------------------------------------------|--------------------------------------------------------------|--------------------------------------------------------------|--------------------------------------------------------------|---------------------------------------------------------|
| 20               | 0.265                                                  | 0.585                                                  | 0.638                                                        | 0.833                                                        | 5.278                                                        | 7.986                                                   |
| 30               | 0.379                                                  | 0.761                                                  | 0.840                                                        | 1.173                                                        | 6.260                                                        | 9.427                                                   |
| 40               | 0.484                                                  | 1.005                                                  | 1.107                                                        | 1.564                                                        | 7.465                                                        | 11.04                                                   |
| 50               | 0.603                                                  | 1.250                                                  | 1.438                                                        | 1.729                                                        | 8.877                                                        | 13.33                                                   |
| 60               | 0.775                                                  | 1.573                                                  | 1.803                                                        | 2.345                                                        | 9.660                                                        | 15.36                                                   |
| 70               | 0.952                                                  | 1.841                                                  | 2.281                                                        | 2.945                                                        | 10.808                                                       | 18.27                                                   |
| 80               | 1.196                                                  | 2.281                                                  | 2.784                                                        | 3.732                                                        | 12.225                                                       | 20.53                                                   |

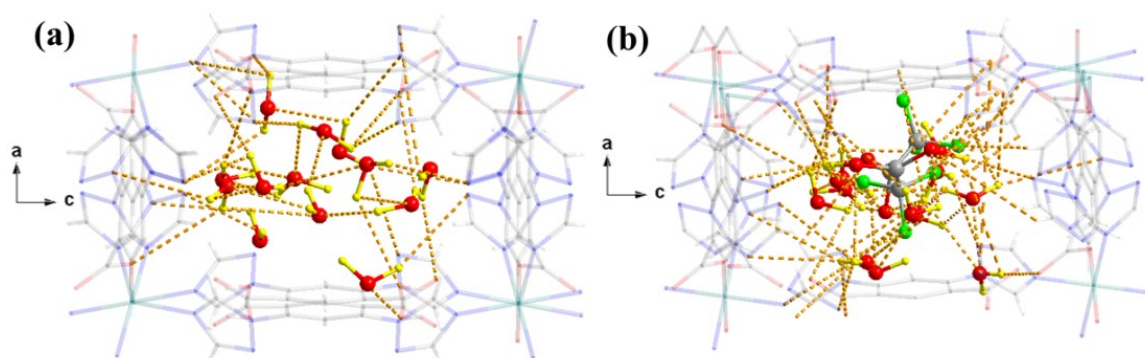

**Figure S30.** (a) Hydrogen-bonding interactions of LCUH-108 with water molecules towards pore channels; (b) hydrogen-bonding interactions of LCUH-108 with imidazole and water molecules towards pore channels.

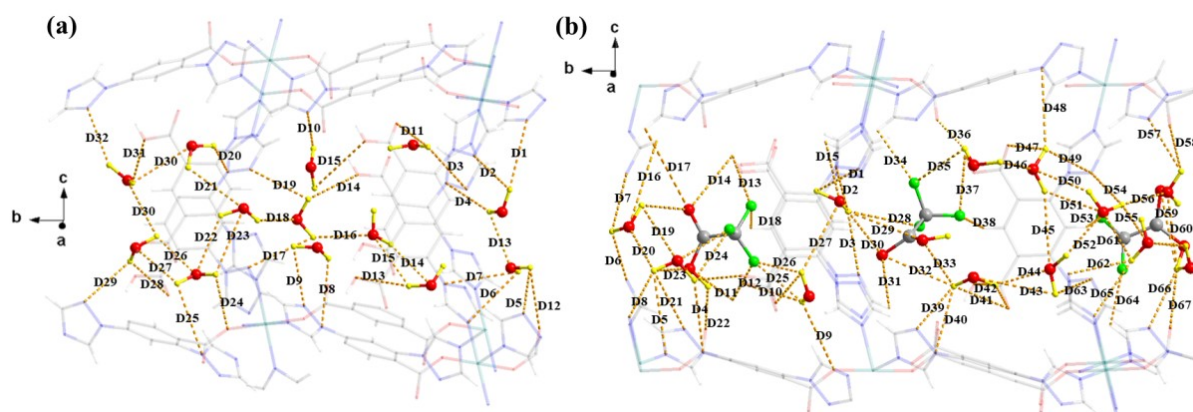

**Figure S31.** (a) Hydrogen–bonding interactions of **LCUH–108** with water molecules along pore channels; (b) hydrogen–bonding interactions of **LCUH–108** with imidazole and water molecules along pore channels.

**Table S13.** The hydrogen–bonding lengths of **LCUH–108** with water molecules (Figure S31a)

| Bond       | Length (Å) |
|------------|------------|------------|------------|------------|------------|------------|------------|
| <b>D1</b>  | 2.808      | <b>D2</b>  | 3.242      | <b>D3</b>  | 3.501      | <b>D4</b>  | 3.455      |
| <b>D5</b>  | 2.989      | <b>D6</b>  | 3.325      | <b>D7</b>  | 3.198      | <b>D8</b>  | 3.008      |
| <b>D9</b>  | 3.265      | <b>D10</b> | 3.555      | <b>D11</b> | 3.293      | <b>D12</b> | 3.055      |
| <b>D13</b> | 3.246      | <b>D14</b> | 3.066      | <b>D15</b> | 3.172      | <b>D16</b> | 3.276      |
| <b>D17</b> | 3.186      | <b>D18</b> | 3.433      | <b>D19</b> | 3.507      | <b>D20</b> | 2.976      |
| <b>D21</b> | 3.437      | <b>D22</b> | 3.466      | <b>D23</b> | 3.398      | <b>D24</b> | 3.188      |
| <b>D25</b> | 3.426      | <b>D26</b> | 3.382      | <b>D27</b> | 3.279      | <b>D28</b> | 3.285      |
| <b>D29</b> | 3.401      | <b>D30</b> | 3.447      | <b>D31</b> | 3.356      | <b>D32</b> | 3.428      |

**Table S14.** The hydrogen–bonding lengths of **TFA@LCUH–108** with water molecules (Figure S31b)

| Bond      | Length (Å) |
|-----------|------------|-----------|------------|-----------|------------|-----------|------------|
| <b>D1</b> | 3.412      | <b>D2</b> | 3.256      | <b>D3</b> | 3.389      | <b>D4</b> | 3.052      |
| <b>D5</b> | 2.987      | <b>D6</b> | 2.930      | <b>D7</b> | 3.266      | <b>D8</b> | 3.249      |

|            |       |            |       |            |       |            |       |
|------------|-------|------------|-------|------------|-------|------------|-------|
| <b>D9</b>  | 3.057 | <b>D10</b> | 3.340 | <b>D11</b> | 2.910 | <b>D12</b> | 3.076 |
| <b>D13</b> | 3.033 | <b>D14</b> | 2.921 | <b>D15</b> | 3.083 | <b>D16</b> | 3.013 |
| <b>D17</b> | 2.915 | <b>D18</b> | 3.082 | <b>D19</b> | 2.536 | <b>D20</b> | 2.549 |
| <b>D21</b> | 3.250 | <b>D22</b> | 2.397 | <b>D23</b> | 2.786 | <b>D24</b> | 2.397 |
| <b>D25</b> | 3.266 | <b>D26</b> | 3.049 | <b>D27</b> | 3.040 | <b>D28</b> | 2.698 |
| <b>D29</b> | 2.910 | <b>D30</b> | 2.883 | <b>D31</b> | 3.003 | <b>D32</b> | 3.189 |
| <b>D33</b> | 3.056 | <b>D34</b> | 3.112 | <b>D35</b> | 3.027 | <b>D36</b> | 3.250 |
| <b>D37</b> | 3.029 | <b>D38</b> | 3.076 | <b>D39</b> | 3.133 | <b>D40</b> | 2.625 |
| <b>D41</b> | 3.425 | <b>D42</b> | 3.375 | <b>D43</b> | 3.257 | <b>D44</b> | 3.066 |
| <b>D45</b> | 3.181 | <b>D46</b> | 3.077 | <b>D47</b> | 3.199 | <b>D48</b> | 3.456 |
| <b>D49</b> | 3.157 | <b>D50</b> | 3.098 | <b>D51</b> | 3.357 | <b>D52</b> | 3.266 |
| <b>D53</b> | 3.278 | <b>D54</b> | 3.182 | <b>D55</b> | 3.455 | <b>D56</b> | 3.256 |
| <b>D57</b> | 3.377 | <b>D58</b> | 3.428 | <b>D59</b> | 3.057 | <b>D60</b> | 3.399 |
| <b>D61</b> | 3.070 | <b>D62</b> | 3.054 | <b>D63</b> | 3.188 | <b>D64</b> | 3.375 |
| <b>D65</b> | 3.099 | <b>D66</b> | 3.500 | <b>D67</b> | 3.282 |            |       |

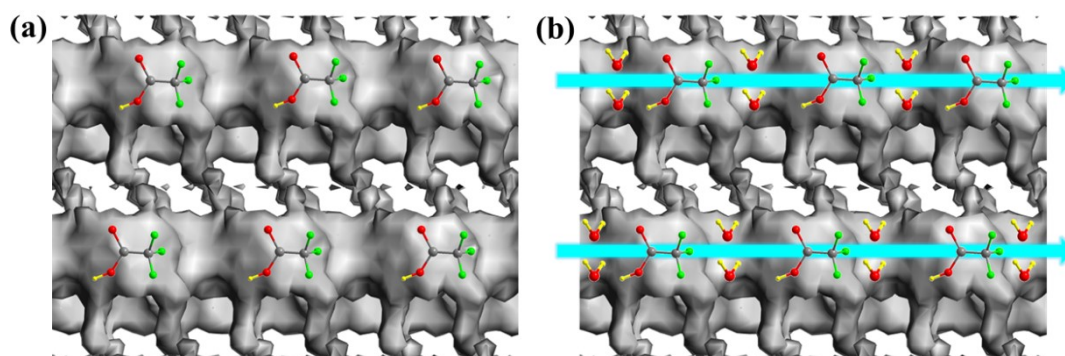

**Figure S32.** (a) Schematic diagram of TFA/LCUH-107. (b) Diagram of proton transport mechanism of TFA/LCUH-107.

**Table S15.** Comparison of proton conductivities between TFA/LCUH-107 and TFA@LCUH-108 with those reported in the literature.

| Compounds   | $\sigma$ ( $S \cdot cm^{-1}$ ) | $E_a$ (eV) | Condition     | References |
|-------------|--------------------------------|------------|---------------|------------|
| Im@(NENU-3) | $1.82 \times 10^{-2}$          | 0.57       | 70 °C, 90% RH | 1          |



|                                        |                       |       |                |           |
|----------------------------------------|-----------------------|-------|----------------|-----------|
| Im-Fe-MOF                              | $1.21 \times 10^{-2}$ | 0.436 | 60 °C, 98% RH  | 2         |
| Im@MOF-808                             | $3.45 \times 10^{-2}$ | 0.25  | 65 °C, 99% RH  | 3         |
| Im@Hf-UiO-66                           | $1.15 \times 10^{-2}$ | 0.40  | 98 °C, 100% RH | 4         |
| Im@Hf-UiO-66-(OH) <sub>2</sub>         | $1.32 \times 10^{-2}$ | 0.36  | 98 °C, 100% RH | 4         |
| Im@MOF-801-Hf                          | $1.46 \times 10^{-2}$ | 0.53  | 100 °C, 98% RH | 5         |
| Nafion                                 | $5.00 \times 10^{-2}$ | 0.22  | 30 °C, 98% RH  | 6         |
| PCMOF2½                                | $2.10 \times 10^{-2}$ | 0.21  | 85 °C, 90% RH  | 7         |
| IM-UiO-66-AS                           | $1.54 \times 10^{-1}$ | 0.20  | 80 °C, 98% RH  | 8         |
| PCMOF10                                | $3.55 \times 10^{-2}$ | 0.4   | 70 °C, 95% RH  | 9         |
| UiO-66(SO <sub>3</sub> H) <sub>2</sub> | $8.40 \times 10^{-2}$ | 0.32  | 80 °C, 90% RH  | 10        |
| VNU-15                                 | $2.90 \times 10^{-2}$ | 0.22  | 95 °C, 60% RH  | 11        |
| MIP-202(Zr)                            | $1.10 \times 10^{-2}$ | 0.22  | 90 °C, 95% RH  | 12        |
| BUT-8(Cr)A                             | $1.27 \times 10^{-1}$ | 0.11  | 80 °C, 100% RH | 13        |
| LCUH-107                               | $3.42 \times 10^{-3}$ | 0.300 | 80 °C, 100% RH | this work |
| LCUH-108                               | $1.20 \times 10^{-2}$ | 0.174 | 80 °C, 100% RH | this work |
| TFA/LCUH-107                           | $2.95 \times 10^{-2}$ | 0.170 | 80 °C, 100% RH | this work |
| TFA@LCUH-108                           | $2.05 \times 10^{-1}$ | 0.157 | 80 °C, 100% RH | this work |

## 5. References.

- 1 Y. X. Ye, W. G. Guo, L. H. Wang, Z. Y. Li, Z. J. Song, J. Chen, Z. J. Zhang, X. C. Xiang, B. L. Chen, Straightforward Loading of Imidazole Molecules into Metal-Organic Framework for High Proton Conduction, *J. Am. Chem. Soc.* 2017, **139**, 15604–15607.
- 2 F. M. Zhang, L. Z. Dong, J. S. Qin, W. Guan, J. Liu, S. L. Li, M. Lu, Y. Q. Lan, Z. M. Su,

- H. C. Zhou, Effect of Imidazole Arrangements on Proton-Conductivity in Metal-Organic Frameworks, *J. Am. Chem. Soc.* 2017, **139**, 6183–6189.
- 3 H. B. Luo, Q. Ren, P. Wang, J. Zhang, L.F. Wang, X. M. Ren, High Proton Conductivity Achieved by Encapsulation of Imidazole Molecules into Proton-Conducting MOF-808, *ACS Appl. Mater. Inter.* 2019, **11**, 9164–9171.
- 4 X. Chen, S. Z. Wang, S. H. Xiao, Z. F. Li, G. Li, High Protonic Conductivity of Three Highly Stable Nanoscale Hafnium(IV) Metal-Organic Frameworks and Their Imidazole Loaded Products, *Inorg. Chem.* 2022, **61**, 4938–4947.
- 5 H. M. Ren, Y. R. Liu, B. Y. Liu, Z. F. Li, G. Li, Comparative Studies on the Proton Conductivities of HafniumBased Metal-Organic Frameworks and Related Chitosan or Nafion Composite Membranes, *Inorg. Chem.* 2022, **61**, 9564–9579.
- 6 Y. Prykhodko, K. Fatyeyeva, L. Hespel and S. Marais, Progress in hybrid composite Nafion-based membranes for proton exchange fuel cell application, *Chem. Eng. J.*, 2021, **409**, 127329.
- 7 S. R. Kim, K. W. Dawson, B. S. Gelfand, J. M. Taylor and G. K. H. Shimizu, Enhancing Proton Conduction in a Metal-Organic Framework by Isomorphous Ligand Replacement, *J. Am. Chem. Soc.*, 2013, **135**, 963–966.
- 8 X. M. Li, J. Liu, C. Zhao, J. L. Zhou, L. Zhao, S. L. Li and Y. Q. Lan, Strategic hierarchical improvement of superprotonic conductivity in a stable metal organic framework system, *J. Mater. Chem. A*, 2019, **7**, 25165–25171.
- 9 P. Ramaswamy, N. E. Wong, B. S. Gelfand and G. K. H. Shimizu, A Water Stable Magnesium MOF That Conducts Protons over  $10^{-2}$  S cm<sup>-1</sup>, *J. Am. Chem. Soc.*, 2015, **137**, 7640–7643.
- 10 W. J. Phang, H. Jo, W. R. Lee, J. H. Song, K. Yoo, B. S. Kim and C. S. Hong, Superprotonic Conductivity of a UiO-66 Framework Functionalized with Sulfonic Acid Groups by Facile Postsynthetic Oxidation, *Angew. Chem. Int. Ed.*, 2015, **54**, 5142–5146.
- 11 T. N. Tu, Phan, N. Q.; Vu, T. T.; Nguyen, H. L.; Cordova, K. E.; Furukawa, H. High proton conductivity at low relative humidity in an anionic Fe-based metal organic framework, *J. Mater. Chem. A.*, 2016, **4**, 3638–3641.

12 F. Yang, G. Xu, Y. Dou, B. Wang, H. Zhang, H. Wu, W. Zhou, J. R. Li and B. Chen, A flexible metal–organic framework with a high density of sulfonic acid sites for proton conduction, *Nat. Energy*, 2017, **2**, 877–883.
